# Supplementary material for: Four new MOFs based on an imidazole-containing ligand and multicarboxylates: syntheses, structures and sorption properties
Source: Royal Society of Chemistry journal article supplement (doi:10.1039/c8ce01448e), 2018-01-01
Supplement: c8ce01448e1.pdf [file c8ce01448e1.pdf]

## Supplementary Information

# Four new MOFs based on imidazole-containing ligand and multicarboxylates: syntheses, structures and sorption properties

Li Luo<sup>a\*</sup>, Shou-Qing Liu<sup>a</sup>, Xiao-Wen Xu<sup>a</sup>, Jing Xu<sup>c</sup>, Jiang-Lin Zhao<sup>b\*</sup>

<sup>a</sup> School of Chemistry and Bioengineering, Suzhou University of Science and Technology, Suzhou 215009, China.

<sup>b</sup> Institute of Biomedical & Health Engineering, Shenzhen Institutes of Advanced Technology, Chinese Academy of Sciences, 1068 Xueyuan Avenue, Shenzhen 518055, China.

<sup>c</sup> Collaborative Innovation Center of Atmospheric Environment and Equipment Technology, Jiangsu Key Laboratory of Atmospheric Environment Monitoring and Pollution Control, School of Environmental Science and Engineering, Nanjing University of Information Science & Technology, Nanjing 210044, China.

**Table S1.** Selected bond lengths (Å) and angles (°) for complexes **1** - **4**

| <b>1</b>             |            |                    |            |
|----------------------|------------|--------------------|------------|
| Zn(1)-O(1)           | 1.993(3)   | Zn(1)-O(3)         | 2.031(4)   |
| Zn(1)-N(12)          | 2.029(4)   | Zn(1)-N(22)#1      | 2.044(4)   |
| O(1)-Zn(1)-N(12)     | 110.20(17) | O(1)-Zn(1)-O(3)    | 102.19(17) |
| N(12)-Zn(1)-O(3)     | 130.77(17) | O(1)-Zn(1)-N(22)#1 | 99.16(16)  |
| N(12)-Zn(1)-N(22)#1  | 99.37(15)  | O(3)-Zn(1)-N(22)#1 | 111.12(17) |
| <b>2</b>             |            |                    |            |
| Zn(1)-O(5)           | 1.932(3)   | Zn(1)-O(9)#1       | 1.936(3)   |
| Zn(1)-N(32)#2        | 2.007(3)   | Zn(1)-N(42)#3      | 2.011(3)   |
| Zn(2)-O(2)           | 1.904(3)   | Zn(2)-O(7)         | 1.958(3)   |
| Zn(2)-N(22)#4        | 2.009(3)   | Zn(2)-N(12)        | 2.043(3)   |
| O(5)-Zn(1)-O(9)#1    | 106.16(14) | O(5)-Zn(1)-N(32)#2 | 107.87(14) |
| O(9)#1-Zn(1)-N(32)#2 | 111.36(14) | O(5)-Zn(1)-N(42)#3 | 129.99(14) |

|                      |            |                       |            |
|----------------------|------------|-----------------------|------------|
| O(9)#1-Zn(1)-N(42)#3 | 93.14(13)  | N(32)#2-Zn(1)-N(42)#3 | 106.90(13) |
| O(2)-Zn(2)-O(7)      | 121.43(16) | O(2)-Zn(2)-N(22)#4    | 125.57(15) |
| O(7)-Zn(2)-N(22)#4   | 104.22(14) | O(2)-Zn(2)-N(12)      | 101.20(15) |
| O(7)-Zn(2)-N(12)     | 94.49(14)  | N(22)#4-Zn(2)-N(12)   | 103.22(14) |
| <b>3</b>             |            |                       |            |
| Co(1)-O(4)#1         | 2.042(4)   | Co(1)-N(12)           | 2.062(4)   |
| Co(1)-N(22)#2        | 2.066(4)   | Co(1)-O(1)            | 2.191(4)   |
| O(4)#1-Co(1)-N(12)   | 98.27(16)  | O(4)#1-Co(1)-N(22)#2  | 112.78(16) |
| N(12)-Co(1)-N(22)#2  | 96.45(15)  | O(4)#1-Co(1)-O(1)     | 150.8(2)   |
| N(12)-Co(1)-O(1)     | 94.26(16)  | N(22)#2-Co(1)-O(1)    | 91.71(18)  |
| <b>4</b>             |            |                       |            |
| Zn(1)-O(1)           | 1.958(3)   | Zn(1)-O(3)#1          | 2.004(3)   |
| Zn(1)-N(32)#2        | 2.025(4)   | Zn(1)-N(12)           | 2.043(4)   |
| Zn(2)-O(7)#3         | 1.938(5)   | Zn(2)-O(5)            | 1.970(7)   |
| Zn(2)-N(22)#4        | 1.984(4)   | Zn(2)-N(42)           | 2.012(4)   |
| O(1)-Zn(1)-O(3)#1    | 105.84(14) | O(1)-Zn(1)-N(32)#2    | 110.13(15) |
| O(3)#1-Zn(1)-N(32)#2 | 121.70(15) | O(1)-Zn(1)-N(12)      | 115.61(15) |
| O(3)#1-Zn(1)-N(12)   | 101.10(14) | N(32)#2-Zn(1)-N(12)   | 102.65(15) |
| O(7)#3-Zn(2)-O(5)    | 104.6(2)   | O(7)#3-Zn(2)-N(22)#4  | 132.17(18) |
| O(5)-Zn(2)-N(22)#4   | 97.2(2)    | O(7)#3-Zn(2)-N(42)    | 100.7(2)   |
| O(5)-Zn(2)-N(42)     | 112.48(19) | N(22)#4-Zn(2)-N(42)   | 109.41(17) |

Symmetry transformations used to generate equivalent atoms: #1  $x-1/2, -y+3/2, z+1/2$  for **1**; #1  $x, y-1, z-1$ ; #2  $x+1, y-1, z$ ; #3  $x+1, -y+1/2, z-1/2$ ; #4  $x, -y+1/2, z+1/2$  for **2**; #1  $x-1/2, y+1/2, -z+1/2$ ; #2  $-x+1/2, y+1/2, z$  for **3**; #1  $-x, y, -z+1/2$ ; #2  $x+1/2, y+1/2, z$ ; #3  $x-1/2, -y+3/2, z-1/2$ ; #4  $x+1/2, y-1/2, z$  for **4**.

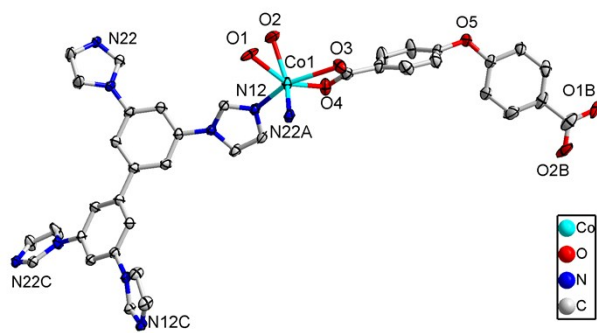

(a)

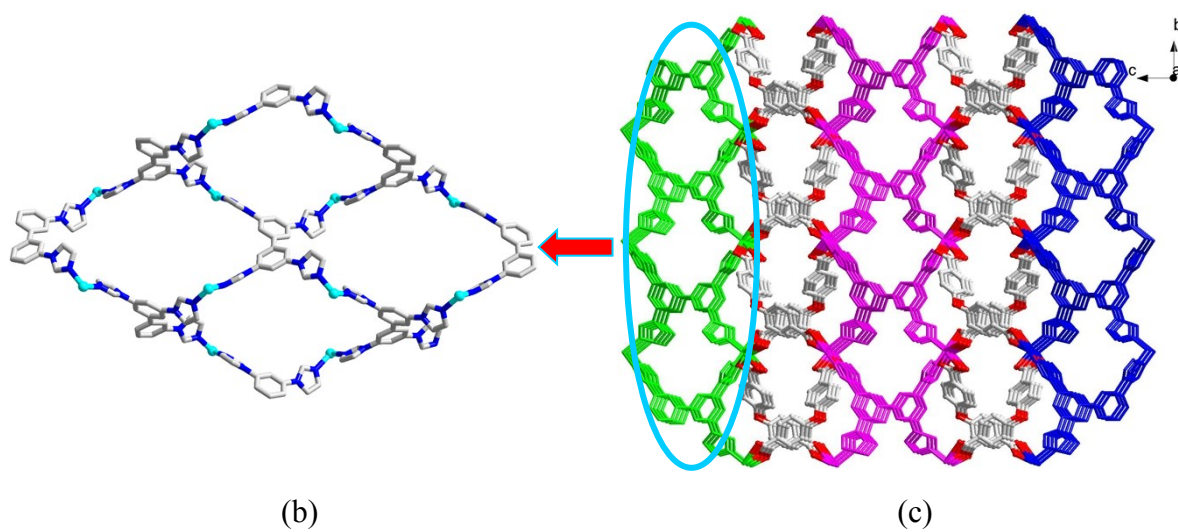

(b)

(c)

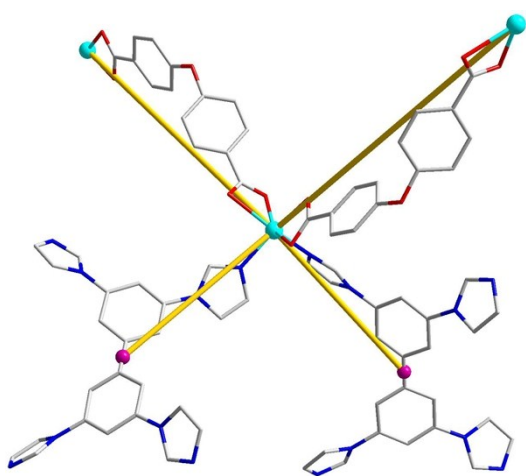

(d)

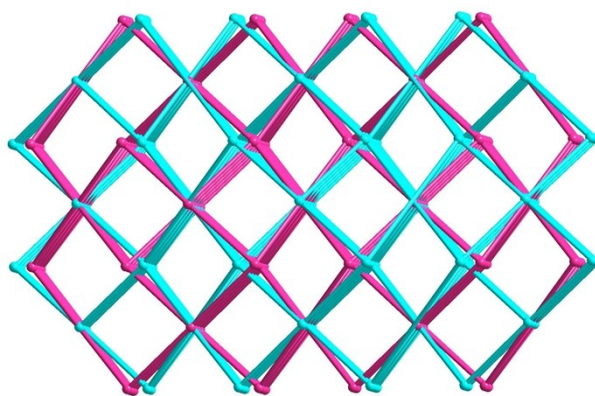

(e)

**Fig. S1.** (a) Coordination environment of Co(II) atom in **3** with the ellipsoid drawn at the 30% probability level. Hydrogen atoms and free water molecules are omitted for clarity. Symmetry codes: A  $1.5-x, 0.5+y, z$ ; B  $-0.5+x, 0.5+y, 0.5-z$ ; C  $1-x, y, -0.5-z$ . (b) The structure of Co(II)-L layer. (c) 3D framework of **3** with different 2D layers displayed by distinct colors. (d) The 4-connected node of Co(II). (e) Schematic representation of the (4,4)-connected binodal 2-fold interpenetrating 3D framework of **3** with point (Schläfli) symbol of  $(6^2.8^4)$ .

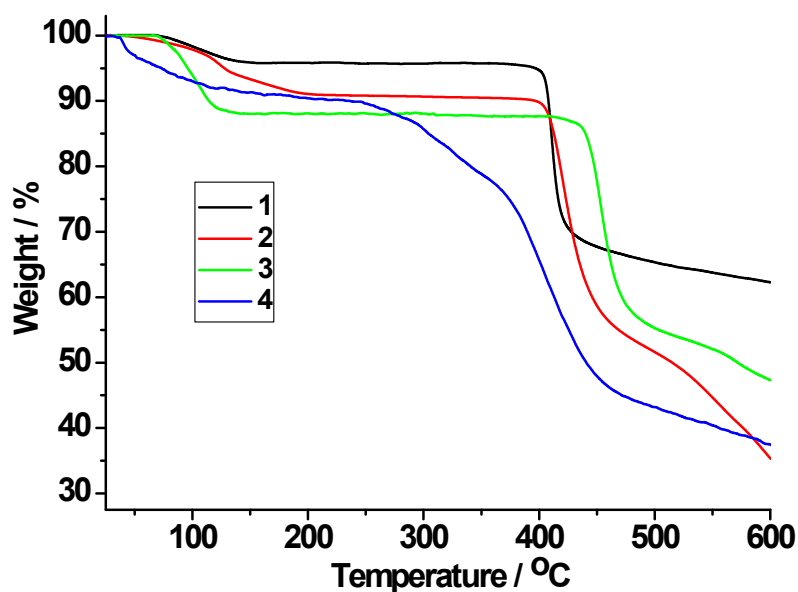

(a)

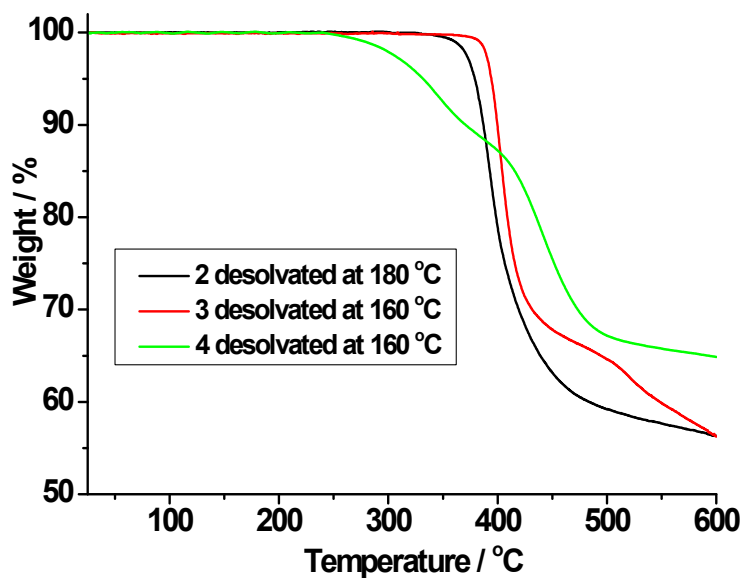

(b)

Fig. S2. TGA curves for complexes 1 - 4 (a) and desolvated samples 2 - 3 (b).

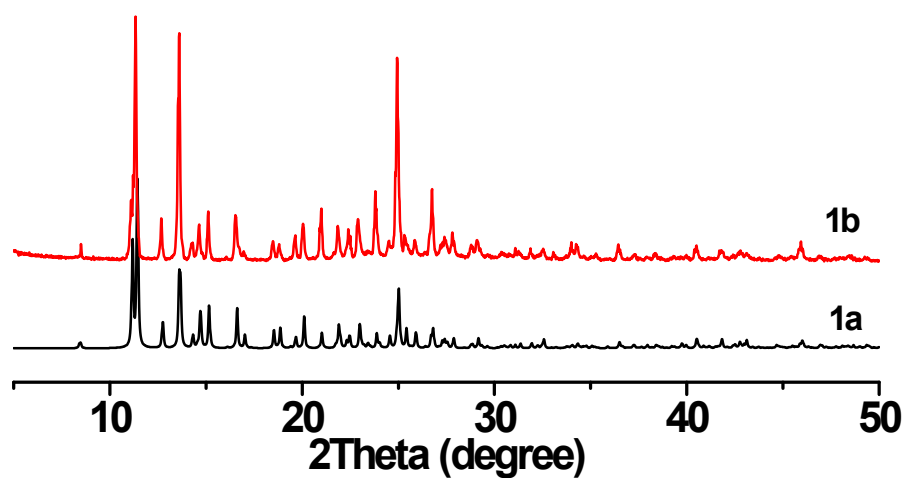

(a)

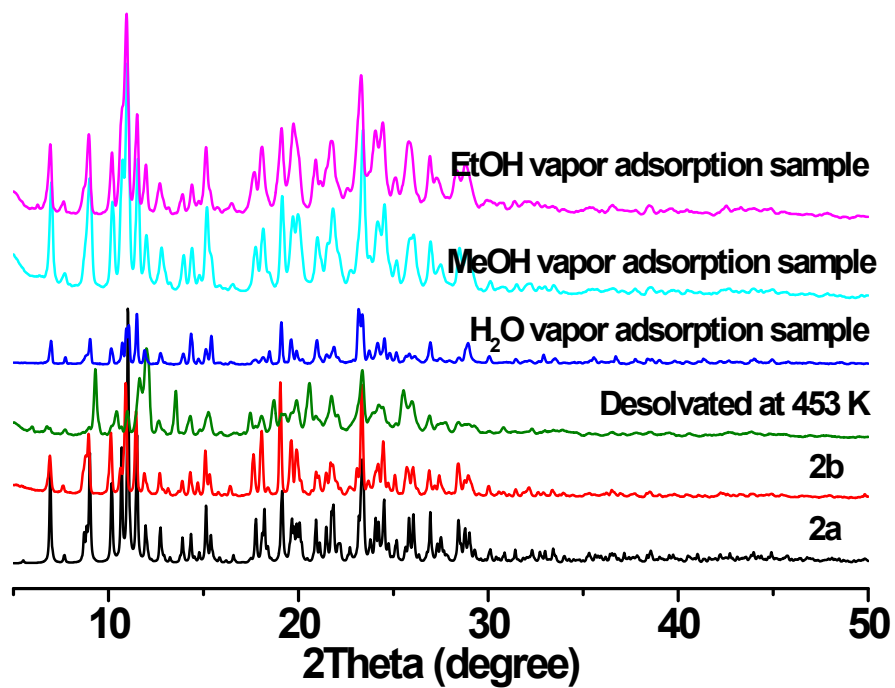

(b)

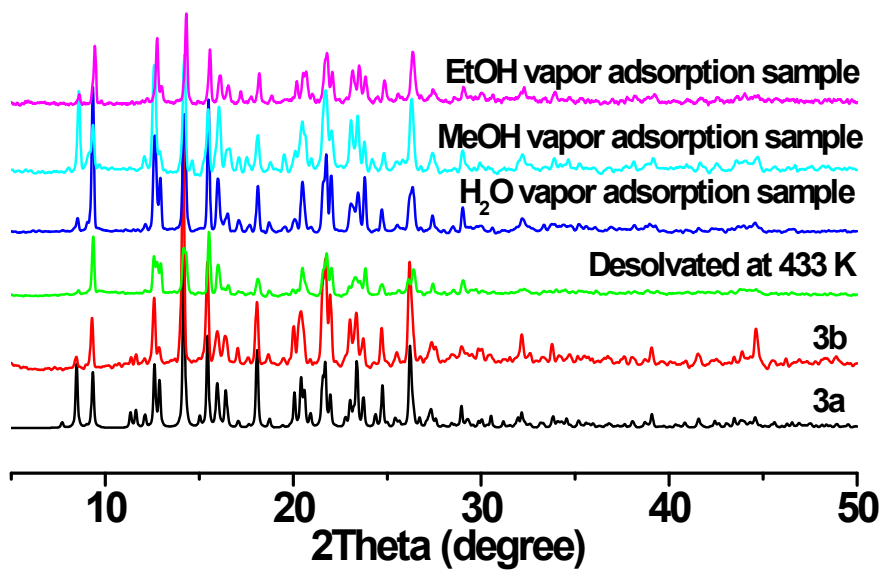

(c)

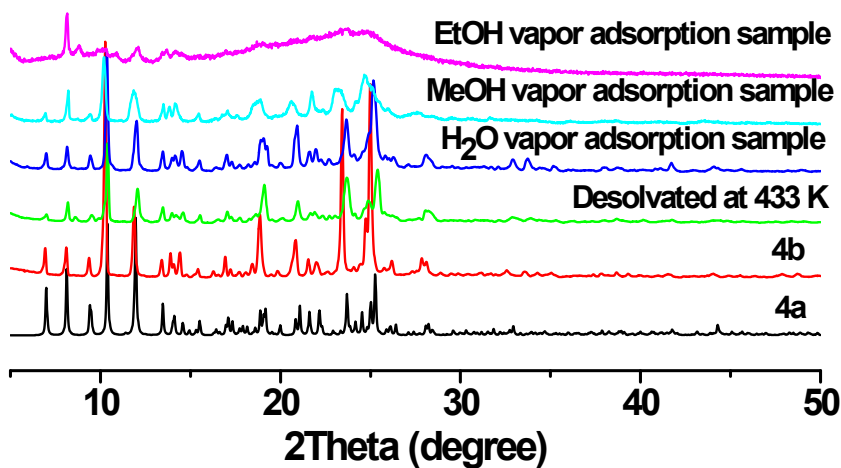

(d)

**Fig. S3.** (a) The PXRD pattern of complex 1: a-simulated; b- as-synthesized. (b) - (d) The PXRD patterns of complexes 2 - 4 under different conditions: a-simulated; b- as-synthesized.
